# Supplementary material for: Comparison of Expression of Secondary Metabolite Biosynthesis Cluster Genes in Aspergillus flavus, A. parasiticus, and A. oryzae
Source: Toxins (Basel). 2014 Jun 23;6(6):1916–28. doi: 10.3390/toxins6061916 (PMC4073137; doi:10.3390/toxins6061916)
Supplement: Supplementary File 1 — Supplementary Table 1 (XLSX, 73 KB) [file toxins-06-01916-s001.xlsx]

## Sheet: Sheet1
Table S1. Gene clusters and comparison of gene expression levels in A. flavus, A. oryzae, and A. parasiticus organized by SMURF cluster numbers for A. flavus NRRL3357a
No.	A. flavus gene namesa	NRRL3357 gene		Gene size (bp)	RPKM
	gene name	Genebank Accession number	Broad accession number		NRRL3357	Af70	CA42	RIB40	BN9
1	Protein phosphatase 2C	AFLA_002820	AFL2G_09600	1202	156.074	13.6713	2.67663	3.7232	4.31215
1	alphaalpha-trehalose-phosphate synthase subunit	AFLA_002830	AFL2G_09601	1656	72.91	4.0542	40.4014	1.20742	25.4328
1	HHE domain protein	AFLA_002840	AFL2G_09602	633	34.8826	3.90482	205.324
1	calcium binding protein Caleosin	AFLA_002850	AFL2G_09603	1086	258.791	19.5039	16.0016	1.42646	12.7742
1	NAD binding Rossmann fold oxidoreductase	AFLA_002860	-	1354	43.185			0.783831	9.86158
1	AMP-binding enzyme family protein	AFLA_002890	AFL2G_09606	1792	4.17881	4.40607	2.42897	7.3816	1.51059
1	polyketide synthase 2432aa KS-AT-DH-M-NADB-PP	AFLA_002900	AFL2G_09607	7319	2.02706	1.86081	8.4099	4.5927	5.24045
1	conserved hypothetical protein	AFLA_002910	-	553	5.40296	32.0978	1.49625	16.4132
1	flavonoid 3-hydroxylase	AFLA_002920	AFL2G_09608	1959	1.87764	0.474279	0.0884348	0.578764	0.50383
2	FAD dependent oxidoreductase	AFLA_004220	AFL2G_09733	1403	2.16451	2.23261	1.38765	1.47004	8.21568
2	hypothetical protein	AFLA_004230	-	268	0
2	conserved hypothetical protein	AFLA_004240	-	995	4.24426	1.69102	3.2582	1.78175	5.77822
2	zinc binding dehydrogenase	AFLA_004250	AFL2G_09734	1151	5.55855	2.86672	3.56356	3.38488	1.50702
2	MFS transporter	AFLA_004260	AFL2G_09735	1819	0.98058	5.6032	0.671644	3.37103	0.315596
2	conserved hypothetical protein	AFLA_004270	AFL2G_09736	1629	0.594178	2.86008	1.06659	0.387454
2	C6 transcription factor	AFLA_004280	AFL2G_09738	1338	0.204394	0.677116	0.420853	0.114906
2	conserved hypothetical protein	AFLA_004290	AFL2G_09740	1382	26.1509	3.26954	0.348368	3.30547	0.699687
2	dimethylallyl tryptophan synthase	AFLA_004300	AFL2G_09741	1340	0	0	0.116713	0	0
3	ABC multidrug transporter	AFLA_004440	AFL2G_09756	4094	0.12367	0.0913159	0.749183	0.0577292	2.42967
3	nonribosomal peptide synthase 5011aa C-A-PP-C-C-A-PP-C-A-PP-C-A-PP	AFLA_004450	AFL2G_09757	16527	2.29601	0.180741	0.913678	2.92807	2.5673
4	hypothetical protein	AFLA_005430	AFL2G_09857	965	53.6735	7.95038	0.247073		15.6268
4	nonribosomal peptide synthase 2621aa C-A-PP-C-A-PP-C	AFLA_005440	AFL2G_09859	7961	1.04497	0.154686	1.09603	0.0677915
4	conserved hypothetical protein	AFLA_005450	AFL2G_09860	1122	4.37335	2.18866	0.816203	9.6704
4	cytochrome P450	AFLA_005460	AFL2G_09861	628	7.74227	5.15126	0.384205
5	polyketide synthetase KS-AT-PP-PP-TE	AFLA_006170	AFL2G_09923	6650	1.31568	1.0555	0.562317	1.21429	42.8044
5	conidial pigment biosynthesis oxidase Arb2/brown2	AFLA_006180	AFL2G_09924	1480	6.52358	1.27088	0.406233	0.326875	10.0214
5	multicopper oxidase	AFLA_006190	-	641	5.59164
6	monooxygenase	AFLA_008700	AFL2G_12036	1018	0				0
6	monooxygenase	AFLA_008710	-	470	0
6	conserved hypothetical protein	AFLA_008720	AFL2G_12038	1127	11.5618	2.65013	25.8192	10.6348	5.74676
6	hypothetical protein	AFLA_008730	-	377	0.621293	0	0.637292
6	oxidoreductase short chain dehydrogenase/reductase family	AFLA_008740	AFL2G_12039	1013	8.89579	0.407808	5.32284	10.3125	0.643147
6	hypothetical protein	AFLA_008750	AFL2G_12041	401	48.4518	5.74194	0		4.46818
6	multidrug resistance protein	AFLA_008760	-	4241	0.416399	0.303272	2.45986	0.0473644	0
6	nonribosomal peptide synthase 5209aa A-C-C-A-PP-C-A-PP-C-A-PP-C-C	AFLA_008770	AFL2G_12042	15691	0.0601021	0.0409905	0.41273	0.0261277	0.423743
6	asparagine synthetase	AFLA_008780	AFL2G_12043	2302	0.114115	0	0.180042	0	1.01519
6	conserved hypothetical protein	AFLA_008790	AFL2G_12044	804	1.33248	0.454268	0	2.41484	0.544201
6	conserved hypothetical protein	AFLA_008800	-	431	0
6	hypothetical protein	AFLA_008810	-	383	0
7	NRPS-like enzyme 611aa A-PP-epimerase	AFLA_009120	AFL2G_12077	1947	0.511653	4.93327	0.541097	0.355728
7	long-chain-fatty-acid CoA ligase	AFLA_009130	AFL2G_12078	542	0
7	PKS-like enzyme 396aa KS-PP	AFLA_009140	AFL2G_12079	1462	0.394373	1.04399	0.194664	0.208143	0
7	hypothetical protein	AFLA_009150	AFL2G_12080	194	0	3.84505	0
7	conserved hypothetical protein	AFLA_009160	AFL2G_12081	1101	0	1.7884	0.40016	0.479315	0
7	HMG-CoA reductase	AFLA_009170	AFL2G_12082	3309	21.7245	12.7751	1.8826	30.8915	33.9581
7	conserved hypothetical protein	AFLA_009180	AFL2G_12083	632	0.371009	0	0	0.365928	0.85322
7	efflux pump antibiotic resistance protein	AFLA_009190	AFL2G_12084	509	0	2.07041	0
7	conserved hypothetical protein	AFLA_009200	AFL2G_12085	1561	5.06742	1.16812	1.45206	13.5384	0.927818
7	hypothetical protein	AFLA_009210	-	453	11.0617				2.04567
8	ABC multidrug transporter	AFLA_009980	AFL2G_12159	3923	0.303893	0	0.408497	0.0980731	0.248232
8	1-aminocyclopropane-1-carboxylate oxidase	AFLA_009990	AFL2G_12160	1029	1.29608	2.59773	0.322918	0.346375	0.910406
8	polyketide synthase 396aa KS-AT-DH-MT	AFLA_010000	AFL2G_12161	5997	0.404772	1.35929	0.579327	0.763385
8	nonribosomal peptide synthase 1626aa PP-C-A-PP-NADB	AFLA_010010	-	4880	1.10664				0.0437831
8	nonribosomal peptide synthase 1338aa A-pp-C	AFLA_010020	AFL2G_12162	4110	1.75391	2.05618	0.214703	2.15833	0.64266
8	oxidoreductase 2OG-Fe(II) oxygenase family	AFLA_010030	AFL2G_12163	1135	1.35751	5.61712	0.23275	1.97283	0
8	conserved hypothetical protein	AFLA_010040	AFL2G_12164	1565	1.14401	0.904718	0.472346	0.95863	1.06341
8	alcohol dehydrogenase	AFLA_010050	AFL2G_12165	1136	2.49598	1.87237	0.581876	1.13543	1.13194
8	conserved hypothetical protein	AFLA_010060	AFL2G_12166	908	0	0.597013	0.296853	0.237428	0.358208
9	O-methyltransferase family protein	AFLA_010550	AFL2G_12206	1024	14.2577	0.256949	0.95822		2.8366
9	hypothetical protein	AFLA_010560	-	275	15.3162
9	hypothetical protein	AFLA_010570	-	411	23.8252				7.38221
9	nonribosomal peptide synthase 7763 aa A-C-A-CC-A-PP-C-A-C-A-M-C-A-TE	AFLA_010580	AFL2G_12207	23345	1.36118	2.56535	0.641232		0.54546
9	siderophore biosynthesis lipase/esterase	AFLA_010590	AFL2G_12208	320	1.46323	0	1.92808	19.271	0
9	siderophore biosynthesis acetylase	AFLA_010600	AFL2G_12209	1475	0.166915	0	1.15474	2.60199	0
9	enoyl-CoA hydratase/isomerase family protein	AFLA_010610	AFL2G_12210	884	0.57561	0.791628	0	4.52244	0
9	nonribosomal siderophore peptide synthase 2100aa A-PP-C-A-PP-C	AFLA_010620	AFL2G_12211	6355	0.856977	0.563672	1.05103	7.81141	0.617742
9	ABC multidrug transporter	AFLA_010630	AFL2G_12212	3983	2.53476	0.486422	0.393029	3.81399	0
9	MFS siderophore transporter	AFLA_010640	AFL2G_12213	1943	2.10156	1.08384	1.3473	22.5802	3.70349
10	O-methyltransferase family protein	AFLA_016120	AFL2G_03258	867	39.5813	95.515	0.617683	57.1727	42.8808
10	hypothetical protein	AFLA_016130	-	540	32.9015
10	conidial pigment biosynthesis scytalone dehydratase	AFLA_016140	AFL2G_03259	461	15.7583	40.5478	0.521421
11	conserved hypothetical protein	AFLA_022990	AFL2G_01547	743	3.78788	1.30236	4.85678	14.3101	18.411
11	Ankyrin domain protein	AFLA_023000	AFL2G_01548	1068	1.38554	2.2231	0.473739	1.34334	0
11	GA4 desaturase family protein	AFLA_023010	AFL2G_01549	995	15.3419	0	0.528282	7.06662	1.7093
11	NRPS-like enzyme 1021aa A-PP-SDR_e1	AFLA_023020	AFL2G_01550	3065	0.0765978	0	0.432137	0	1.32909
11	cytochrome P450 oxidoreductase GliC-like	AFLA_023030	-	1659	0			0.554859	0.653041
11	C6 transcription factor	AFLA_023040	AFL2G_01551	2118	2.11576	1.4021	0.672269	1.84995	5.91434
11	MFS transporter	AFLA_023050	AFL2G_01552	1501	1.06027	2.67331	0.362523	3.68737	2.15836
11	hypothetical protein	AFLA_023060	-	268	0
11	integral membrane protein	AFLA_023070	AFL2G_01553	1797	37.9528	18.6969	0.612968		11.3194
11	integral membrane protein TmpA	AFLA_023080	AFL2G_01554	1415	10.9463	6.84289	0.0850623	67.9277	8.63343
11	conserved hypothetical protein	AFLA_023090	-	688	1.7526	3.21377	0	2.94098
12	short chain type dehydrogenase	AFLA_028710	AFL2G_02081	758	14.8521	37.0219	0.158693	3.12419	12.7511
12	NRPS-like enzyme 1011aa A-PP-TE	AFLA_028720	AFL2G_02082	3035	1.46974	0.108859	5.84582	0.196335	5.2011
12	conserved hypothetical protein	AFLA_028730	-	518	0	0	0	0
13	nonribosomal peptide synthase 2975aa A-PP-C-A-PP-C-A	AFLA_038600	AFL2G_04847	9106	0.210438	2.40776	0.857096	1.87122	4.1671
13	Ankyrin repeat protein	AFLA_038610	AFL2G_04848	882	4.26444	3.35133	0.312447		1.07804
13	branched-chain amino acid aminotransferase	AFLA_038620	AFL2G_04849	1998	10.2108	24.0551	3.17257	13.2507	10.0909
13	cytochrome P450	AFLA_038630	AFL2G_04850	1856	1.18163	6.00419	0.231631	1.31657	2.28564
14	enterobactin transporter MirA	AFLA_041040	AFL2G_05060	2250	0	0	0.596278	0	0
14	enterobactin esterase IroE-like	AFLA_041050	AFL2G_05061	1045	0	0.32924	0.368343	0	0
15	potassium uptake protein Trk family protein	AFLA_045450	AFL2G_05463	3748	0.298032	8.21966	2.64457	5.1541	46.1318
15	hypothetical protein	AFLA_045470	AFL2G_05465	1688	0	0	0.113738	0	0.388537
15	hypothetical protein	AFLA_045480	-	590	1.19213	2.00611	0	0	0.447997
15	dimethylallyl tryptophan synthase	AFLA_045490	AFL2G_05466	1374	0	0.24693	104.333	0	0
15	cytochrome P450	AFLA_045500	AFL2G_05467	1938	0.158147	0	103.602	0	2.30336
15	terpene cyclase AtmB	AFLA_045510	AFL2G_05468	792	0	0	47.2249	0	0.695864
15	integral membrane protein	AFLA_045520	-	490	0	0	2.40678	0
15	conserved hypothetical protein	AFLA_045530	-	389	0			0
15	cytochrome P450	AFLA_045540	AFL2G_05469	1838	0.150544	0.207041	81.457	0	0
15	hypothetical protein	AFLA_045550	-	320	1.46323
15	methylenetetrahydrofolate reductase	AFLA_045560	AFL2G_05470	1884	2.83634	0.629599	41.9495	3.5782	1.3239
15	amino acid transporter	AFLA_045570	AFL2G_05471	1036	0.254165	0.34955	6.1267	0.220983	0
16	L-ornithine N5-oxygenase	AFLA_047190	AFL2G_05631	1574	8.40413	1.07019	1.83586	14.0022	1.01066
16	palmitoyltransferase	AFLA_047200	AFL2G_05632	2526	13.9866	6.27296	2.72015	18.8212	17.0251
17	C6 protein	AFLA_053760	AFL2G_10570	1656	8.37445	0.83297	3.184	20.9502	5.35829
17	PKS-like enzyme 286 aa haloacid dehalogenase-alcohol deydrogenase	AFLA_053770	-	860	0.272763				0
17	PKS-like enzyme 327 aa DH	AFLA_053780	AFL2G_10571	1054	0	0	0.0925102	0
17	hypothetical protein	AFLA_053790	-	647	0
17	hypothetical protein	AFLA_053800	-	545	0				1.04809
17	alpha-ketoglutarate-dependent taurine dioxygenase	AFLA_053810	AFL2G_10572	1245	0.593053	0	10.6582	0.323338	0.48931
17	FAD dependent oxidoreductase	AFLA_053820	AFL2G_10573	1684	0.702089	1.14129	15.1802	0.134778	0.332271
17	MFS transporter	AFLA_053830	AFL2G_10574	2040	0	0.227294	0.423815	0	0
17	conserved hypothetical protein	AFLA_053840	AFL2G_10575	2669	1.14346				5.32379
17	hypothetical protein	AFLA_053850	AFL2G_10576	518	0.452503
17	hypothetical protein	AFLA_053860	-	481	0
17	polyketide synthase 2895 aa KS-AT-DH-MT-ER-KR-NADB/TE	AFLA_053870	AFL2G_10577	9062	0.702817	0.521002	1.0131	1.08255	0.869236
18	MFS transporter	AFLA_054260	AFL2G_10611	1772	0.455133	0.208646	0.70028	0.604554	5.08736
18	NRPS-like enzyme 1251 aa A-pp-NADB-gntK(gluconate kinase)	AFLA_054270	AFL2G_10612	3810	0.0625263	0	0.451117	0.279518	0
18	conserved hypothetical protein	AFLA_054280	-	446	0	3.07604	0	0	1.51599
18	aldehyde reductase I	AFLA_054290	AFL2G_10613	1036	0	0.332288	1.11526	0	0.524045
18	pantothenate transporter	AFLA_054300	AFL2G_10614	1727	0.161742	0	0.165907	0.281251	0
18	C6 factor	AFLA_054310	AFL2G_10615	2197	0.426223	0	0.712063	0.278945	0.231955
19	AMP-binding enzyme	AFLA_060660	AFL2G_06210	1783	55.9164	18.5289	2.39361	111.016	13.5455
19	integral membrane protein	AFLA_060670	AFL2G_06211	1256	16.9986			98.6358	12.5771
19	dimethylallyl tryptophan synthase	AFLA_060680	AFL2G_06212	1440	68.7529	37.2134	0.610969	134.844	19.6753
19	cytochrome P450	AFLA_060690	AFL2G_06213	1767	58.6366	19.3292	0.775085
19	phenylalanine ammonia-lyase	AFLA_060700	AFL2G_06214	2252	32.7213	7.27852	1.18752	74.0888	14.3252
19	toxin biosynthesis protein	AFLA_060710	AFL2G_06215	1395	44.234	44.5408	14.9018	120.894	25.6288
20	aldo-keto reductase	AFLA_062800	AFL2G_06388	1031	34.8177	48.1973	30.6956	39.7032	3.45504
20	conserved hypothetical protein	AFLA_062810	AFL2G_06389	1149	0	1.0555	0	0	3.39581
20	polyketide synthase 2355aa KS-AT-DH-MT-KR-ER-KR-PP	AFLA_062820	AFL2G_06390	7922	1.13409	11.9624	0.333388	2.46664	17.9755
20	monoxygenase	AFLA_062830	-	1548	9.6828	203.582	0.82612		31.6688
20	esterase/lipase	AFLA_062840	AFL2G_06391	794	5.02192	87.3479	0.151507	7.38029	12.8144
20	fatty acid desaturase	AFLA_062850	AFL2G_06392	1682	13.5356	27.4431	7.58616	24.403	14.5275
20	polyketide synthase 2245aa KS-AT-PP-TE	AFLA_062860	AFL2G_06393	6737	2.12612	34.8965	0.822294	6.54395	38.9247
20	conserved hypothetical protein 241 aa	AFLA_062870	AFL2G_06394	725	0	0.889764	0	0.281251	0.832308
20	short chain dehydrogenase/oxidoreductase	AFLA_062880	AFL2G_06395	833	0	0	0.463262	0.26178	0
20	hypothetical protein-70aa	AFLA_062890	-	403	102.263	9011.72	0		4.78284
20	acyltransferase 708 aa	AFLA_062900	AFL2G_06397	2126	21.5306	18.222	3.28444	21.0846	10.0581
20	proline permease 568aa	AFLA_062910	AFL2G_06398	2166	8.94269	10.425	0.353428	5.03281	4.58069
20	glutathione HCHO-activating GFA superfamily 211aa	AFLA_062920	AFL2G_06399	635	13.6626	20.8213	2.08322	29.6231	5.6063
20	glycosyl hydrolase 330aa	AFLA_062930	AFL2G_06400	1035	2.12854	4.29325	0.369473	4.34101	1.56249
20	choline transport 431aa	AFLA_062940	AFL2G_06401	1555	0
20	aa permease	AFLA_062950	-	412	0
20	C6 factor 658aa	AFLA_062960	AFL2G_06402	2131	0.118791
20	Cu oxidase/tyramine oxidase 677aa	AFLA_062970	AFL2G_06403	2243	0
20	crotonase/enoylCoA hydratase	AFLA_062980	-	1044	5.77928
20	amino cyclopropase-1-carboxylate oxidase 363 aa	AFLA_062990	AFL2G_06404	1313	0.645189
20	hydrolase	AFLA_063000	AFL2G_06405	1426	0
20	transporter	AFLA_063010	-	1488	0
20	multidrug resistance protein	AFLA_063020	AFL2G_06406	1764	0.32823
21	nonribosomal peptide synthase2074aa A-PP-C-A-PP-Cpartial	AFLA_064240	AFL2G_07262	6296	16.3384	1.29207	1.15642	1.69017	15.8076
21	phenol 2-monooxygenase	AFLA_064250	AFL2G_07263	791	73.7397	2.90106	0.540935	3.14302	31.9896
21	oligopeptide transporter	AFLA_064260	AFL2G_07264	1928	74.0514	8.57304	6.09676	3.58434	23.582
21	gibberellin 2-oxidase	AFLA_064270	AFL2G_07265	1160	250.72	25.3668	1.64998	1.27379	74.3976
21	N-methyltransferase	AFLA_064280	AFL2G_07266	1165	107.269	5.25178	0.108806	0.827342	33.2199
21	O-methyltransferase	AFLA_064290	AFL2G_07267	743	433.713	55.5672	0.161893	8.09932	89.3635
21	fructosyl amino acid oxidase	AFLA_064300	AFL2G_07268	1511	34.3203	11.6877	1.17347	2.69912	13.1154
21	hypothetical protein	AFLA_064310	-	317	22.8941
21	oligopeptide transporter	AFLA_064320	AFL2G_07269	3233	189.809	7.20411	2.23881	6.50882	18.3387
21	conserved hypothetical protein	AFLA_064330	AFL2G_07270	1655	3.68724	12.5188	0.509295	4.98831	5.61808
21	conserved hypothetical protein	AFLA_064340	AFL2G_07271	800	2.05236	30.242	0.150372	2.57872	6.3592
21	MFS transporter	AFLA_064350	AFL2G_07272	1783	0.456017	0.391496	0.0729989	0.659522	0.658104
21	ABC multidrug transporter	AFLA_064360	AFL2G_07273	4601	0.822176	0.24599	0.18347	0.702194
21	C6 transcription factor	AFLA_064370	AFL2G_07274	2435	0.926425	2.08274	0.836446
21	conserved hypothetical protein	AFLA_064380	AFL2G_07275	1877	4.85713	0.195748	0.510992	83.1284	23.462
21	cytochrome P450 oxidoreductase	AFLA_064390	-	1812	1.1048	0	0.162548	17.0157	3.75794
21	benzoate 4-monooxygenase cytochrome P450	AFLA_064400	AFL2G_07276	1819	1.43201	0.21927	1.22656	16.08	6.55696
21	conserved hypothetical protein	AFLA_064410	-	1481	0.596063	4.47608	0.263563	13.2543	13.0608
21	gliotoxin biosynthesis protein	AFLA_064420	AFL2G_07277	460	1.83476	1.17877	0.146531	30.4184	8.08527
21	macrolide phosphotransferase	AFLA_064430	AFL2G_07278	1655	3.68724	7.99659	0.800079	29.6983	55.3665
21	transport protein	AFLA_064440	AFL2G_07279	2390	1.32061	0.401223	1.29675	21.1932	10.3351
21	aminotransferase	AFLA_064450	-	1232	1.79731			29.8252	16.9387
21	conserved hypothetical protein	AFLA_064460	AFL2G_07280	1353	0.378178	0	0.682979	9.48242	3.6911
21	cytochrome P450	AFLA_064470	AFL2G_07281	1926	1.32683	0.205069	0	24.275	6.43147
21	conserved hypothetical protein	AFLA_064480	-	1049	3.32109	0.326247	0.48666
21	conserved hypothetical protein	AFLA_064490	AFL2G_07282	1070	5.43632	3.36442	0.697038	44.8451	38.3208
21	conserved hypothetical protein	AFLA_064500	AFL2G_07283	997	64.863	48.8749	1.27458	149.793	168.713
21	thioredoxin reductase	AFLA_064510	AFL2G_07284	1057	2.10312	0.642755	0.119849	25.581	6.58889
21	O-methyltransferase	AFLA_064520	AFL2G_07285	1355	4.10054	7.6901	0.462551	34.9676	14.4752
21	glutathione S-transferase	AFLA_064530	-	907	6.02177	0.435876	0.325096	24.5271	16.2716
21	cytochrome P450 oxidoreductase	AFLA_064540	AFL2G_07286	1623	1.69177	0	1.57758	13.3138	4.3365
21	membrane dipeptidase GliJ-like	AFLA_064550	AFL2G_07287	1400	2.95736	0.248641	0.0927238	30.8978	11.6405
21	nonribosomal peptide synthase 1621aa pp-C-A-C	AFLA_064560	AFL2G_07288	4926	0.530895	0.0663757	0.272283	6.80627	2.04827
21	uracil permease	AFLA_064570	AFL2G_07289	1859	0.834277	0.57573	0.644108	7.10312	4.42163
21	oxidoreductase	AFLA_064580	AFL2G_07290	1218	2.13305	0	1.42219	38.1013	7.86497
21	O-methyltransferase	AFLA_064590	AFL2G_07291	882	1.68956	0.51885	0.386982	19.6721	11.8364
21	conserved hypothetical protein	AFLA_064600	AFL2G_07292	1441	0.508331	0.6991	0.173807		3.47299
21	short-chain oxidoreductase	AFLA_064610	AFL2G_07293	1382	0.987797	25.7939	2.50934	3.78126	7.07461
22	pyrroline-5-carboxylate reductase	AFLA_066690	AFL2G_07490	978	3.38099	0.357679	4.93531		0
22	P450 family sporulation-specific N-formyltyrosine oxidase Dit2	AFLA_066700	AFL2G_07491	1496	1.25504	0.400974	1.27102	1.48128
22	conserved hypothetical protein	AFLA_066710	AFL2G_07492	1130	3.17034	2.79882	2.08749	5.57694
22	nonribosomal peptide synthase 5326aa A-pp-C-A-pp-C-A-C-A-pp-C-A-pp-C	AFLA_066720	AFL2G_07493	16342	0.308606	0.141953	0.884815	0.472658
22	alcohol dehydrogenase	AFLA_066730	AFL2G_07494	1076	14.3919	6.03145	0.787243	6.93927	6.18286
22	MSF multidrug transporter	AFLA_066740	AFL2G_07496	1397	0.433701	22.2681	1.01096	0.265065	3.04284
23	oxidoreductase zinc-binding dehydrogenase family protein	AFLA_066820	AFL2G_07504	1170	12.6881			15.1375	3.00515
23	Fungal specific transcription factor domain containing protein 636 aa	AFLA_066830	AFL2G_07506	2362	3.07233	2.36944	0.662714	2.4686	2.09188
23	hybrid NRPS/PKS enzyme3946 aa	AFLA_066840	AFL2G_07507	11840	0.714007	0.654643	2.57355	0.919089	2.83917
23	conserved hypothetical protein	AFLA_066850	-	478	0
23	C6 factor 565 aa	AFLA_066860	AFL2G_07508	1778	3.73435	3.96487	1.47859		5.273
23	conserved hypothetical protein	AFLA_066870	-	422	2.22079				3.61257
23	monocarboxylate transporter MFS transporter 405 aa	AFLA_066880	AFL2G_07509	1510	0.32892	0.250375	5.32213	2.12143	0.393946
23	cytochrome P450	AFLA_066890	AFL2G_07510	1911	1.69177	2.32667	8.28229		4.26763
23	C6 factor 828aa	AFLA_066900	AFL2G_07511	2536	0.283292	0.538981	0.502496	0.188019	0.234842
23	conserved hypothetical protein	AFLA_066910	AFL2G_07512	1140	1.51376	0	0.22182	0.145849	0
23	alcohol dehydrogenase	AFLA_066920	AFL2G_07513	1264	3.33536	3.60876	0.672895	0	0
23	cytochrome P450	AFLA_066930	AFL2G_07514	1652	2.4656	4.0373	12.9052	0.318712	0.606395
23	O-methyltransferase	AFLA_066940	-	1393	1.0088	1.38739	19.0399	0	0.437605
23	dehydrogenase 430 aa	AFLA_066950	AFL2G_07515	1404	13.2591	15.2388	5.3877	15.0029
23	hypothetical protein	AFLA_066960	-	426	91.8438
23	phosphodiesterase 559 aa	AFLA_066970	AFL2G_07516	2155	68.0782	4.8937	357.938	71.4332	11.3523
23	polyketide synthase 2462aa KS-AT-DH-MT-KR-PP	AFLA_066980	AFL2G_07518	7520	3.65511	1.9656	9.77913	2.21708
24	ABC multidrug transporter	AFLA_069320	AFL2G_07729	5305	9.54024	25.5518	1.30952		38.4121
24	nonribosomal peptide synthase 5186aa A-PP-C-C-A-PP-C-A-PP-C-C-PP-C	AFLA_069330	AFL2G_07731	15948	17.205	21.9953	6.7995	2.08448	41.1089
24	MSF drug transporter	AFLA_069340	AFL2G_07732	1887	16.1965			9.04039
25	MFS transporter	AFLA_070840	AFL2G_07873	1796	0.588594
25	phosphatidylserine decarboxylase family protein	AFLA_070850	AFL2G_07874	1378	184.195	6.82018	1.99839		14.5974
25	ACV synthetase PcbAB	AFLA_070860	AFL2G_07875	11324	0.933174	0.0855587	0.978476	1.91767	0.0899554
25	isopenicillin N synthetase PcbC homolog	AFLA_070870	AFL2G_07876	995	1.41475	0	1.08839	1.7371	0
25	acyl-coenzyme A:Isopenicillin N acyltransferase PenDE homolog	AFLA_070880	AFL2G_07877	1284	0.656002	0	0.448597	0	0
25	hypothetical protein	AFLA_070890	AFL2G_07878	803	0	0	0.3898	0	0
25	conserved hypothetical protein	AFLA_070900	AFL2G_07879	635	0	0	0.615789	0	0
25	aminotransferase	AFLA_070910	AFL2G_07880	1401	0.543632	0	119.24	0.252084	3.53731
25	NRPS-like enzyme 1008aa A-TE	AFLA_070920	AFL2G_07881	3026	0.0775847	0	9.86824	0	1.68276
26	alcohol dehydrogenase	AFLA_079260	AFL2G_00669	1004	0.23368	0	0.838943	0.406344	0
26	DUF1338-domain possible Zn-binding hydrolase	AFLA_079270	AFL2G_00670	1424	0	0	0.16905	0.14329	0
26	aldehyde dehydrogenase	AFLA_079290	AFL2G_00671	1611	0.779711	0	0.159958	0.271166	0.338229
26	2-amino-3-carboxymuconate-6-semialdehyde decarboxylase	AFLA_079300	-	1332	0.186388	0	0.301875	0	0
26	3-hydroxyanthranilate 34-dioxygenase	AFLA_079310	AFL2G_00672	757	0.442277	0	0	0.860343	0
26	C6 factor	AFLA_079320	AFL2G_00673	2296	1.47505	0.144901	0.70248	4.75113	0.551269
26	amino acid transporter	AFLA_079330	AFL2G_00674	1607	0.659225	0	0.778089	2.04061	0
26	dienelactone hydrolase	AFLA_079340	AFL2G_00675	990	0	0	0	0.235511	0
26	Possible C6 protein	AFLA_079350	AFL2G_00676	734	2.55618	1.46388	0.694798		6.71607
26	PKS-like enzyme 207aa TE-pp only	AFLA_079360	-	757	0	0	0.922975	0	0
26	hypothetical protein	AFLA_079370	-	188	0
26	NRPS-like enzyme 957aa A-PP-NADB	AFLA_079380	AFL2G_00677	2995	0.898865	5.39325	1.21435	8.63204	1.76531
26	hypothetical protein	AFLA_079390	AFL2G_00678	496	0	0	0	0	0
26	NRPS-like enzyme 1278aa A-PP-SDR_e1-NADB	AFLA_079400	AFL2G_00680	3836	5.20254	7.38937	2.88384	16.1614	20.8681
26	MFS transporter	AFLA_079410	AFL2G_00681	1959	3.26179	5.24736	0.202434		3.42435
26	conserved hypothetical protein	AFLA_079420	AFL2G_00682	623	76.4011	58.4891	16.4072	107.339	4.06198
26	amidase	AFLA_079430	AFL2G_00683	784	1.9409	1.12342	1.74563	1.94465	2.52009
27	C6 prot	AFLA_082140	AFL2G_00934	340	0
27	polyketide synthase2045aa KS-AT-PP-TE	AFLA_082150	AFL2G_00935	6544	0.26783	1.57553	162.047	0	1.24177
27	MFS glucose transporter	AFLA_082160	AFL2G_00936	2001	0.590815	5.68777	39.8464	3.11649	4.48504
27	efflux pump antibiotic resistance protein	AFLA_082170	-	1271	0.369259	3.09817	0.577689	0.138058
27	hypothetical protein	AFLA_082180	-	269	0	2.59425	0
28	bicyclomycin resistance protein	AFLA_082450	AFL2G_00963	1503	0.182904	0	0.538402	0	0
28	conserved hypothetical protein	AFLA_082460	AFL2G_00964	915	0.990923	0.510244	21.0261		3.62113
28	AMP dependent CoA ligase	AFLA_082470	AFL2G_00965	2031	0.265816	0	1.26928	0
28	NRPS-like enzyme 396aa PP-C	AFLA_082480	AFL2G_00966	1251	0			0
28	conserved hypothetical protein	AFLA_082490	-	1433	0.982631	0.46428	0.307806	0.923928	0
29	dimethylallyl tryptophan synthase 290aa	AFLA_084080	AFL2G_01107	1135	0	0	1.00374	0	0
29	C6 transcription factor	AFLA_084090	AFL2G_01108	2040	0.992494	0.748689	0.446725	0.976509	0.242558
30	MFS sugar transporter	AFLA_090170	AFL2G_08059	1704	0.143375	0	2.05894	0.373971	0
30	alpha/beta hydrolase	AFLA_090180	AFL2G_08060	890	6.32589	196.473	1.21665	1.3089	4.0018
30	dimethylallyl tryptophan synthase 354aa	AFLA_090190	AFL2G_08061	1597	0	0	0.656649	0	0
30	nonribosomal peptide synthase 1735aa A-PP-C-PP-C	AFLA_090200	AFL2G_08062	5255	0	0.0562788	0.167901	0.0388486	0.0991768
30	amino acid permease	AFLA_090210	AFL2G_08063	1664	10.024	6.34469	1.03516		1.56345
30	integral membrane protein	AFLA_090220	AFL2G_08064	643	2.02806	1.77464	0.551503
31	conserved hypothetical protein	AFLA_094980	AFL2G_08516	769	3573.72	0.478495	195.929	0.605002	0
31	conserved hypothetical protein	AFLA_094990	AFL2G_08517	909	230.825	0	15.4674	0.439114	0
31	hypothetical protein	AFLA_095000	-	265	38.0151
31	conserved hypothetical protein	AFLA_095010	AFL2G_08518	1489	75.1907	0.680325	18.7744	0.143592	0.536464
31	hypothetical protein	AFLA_095020	-	544	209.407	0	37.6243		0.655563
31	gamma glutamyl transpeptidases	AFLA_095030	AFL2G_08520	2064	59.7701	1.09116	19.3965	41.4635	15.4877
31	aspartate amino transferase 439 aa	AFLA_095040	-	1452	122.584	0	24.2721	0.15504	0
31	dimethylaniline monooxygenase 494aa	AFLA_095050	AFL2G_08521	1649	171.115	0	53.4514	0.412501	0
31	tyrosinase	AFLA_095060	-	1349	75.0121	0.299893	17.7821	0.379179	0.943282
31	MFS multidrug transporter	AFLA_095070	AFL2G_08522	1790	22.3445	1.46621	9.21718	1.44201	8.58864
31	conserved hypothetical protein	AFLA_095080	-	893	9.71969
31	C6 transcription factor	AFLA_095090	AFL2G_08523	917	35.5599	0	5.18057	0	5.18885
31	conserved hypothetical protein	AFLA_095100	AFL2G_08524	1232	182.506	1.08749	7.43508	0	0
31	conserved hypothetical protein	AFLA_095110	AFL2G_08525	731	119.991	0.388669	13.6247	0.278945	0.612963
31	efflux pump antibiotic resistance protein	AFLA_095120	AFL2G_08526	1797	7.5187	1.01376	2.41955	11.6473	13.7495
32	dioxygenase	AFLA_096260	AFL2G_08634	880	0.287805	1.07304	0	0.895562	0
32	dehydrogenase	AFLA_096270	AFL2G_08635	1728	0	0	0.27437	0	0
32	hypothetical protein	AFLA_096280	AFL2G_08636	314	0	0	0.331813		0
32	endonuclease/exonuclease/phosphatase family protein	AFLA_096290	AFL2G_08637	2325	0.112637	0	0.411487	0	0
32	HAD superfamily hydrolase	AFLA_096300	AFL2G_08638	2058	0	0	0.403512	0.0855059	0
32	conserved hypothetical protein	AFLA_096310	-	551	0				0
32	transcription factor	AFLA_096320	-	832	2.28325
32	transcription factor	AFLA_096330	AFL2G_08639	2393	2.53236	0.357679	0.622471	0.576803	1.27662
32	hypothetical protein	AFLA_096340	AFL2G_08640	314	35.7865	30.7604	18.354		29.5288
32	TrkA-N domain dehydrogenase	AFLA_096350	-	764	0	1.95748	0.364995	0	0.741444
32	hypothetical protein	AFLA_096360	-	644	0
32	aflatrem-Zn2Cys6 transcription factor	AFLA_096370	AFL2G_08641	2530	1.29641	1.09719	0.664895	2.7037	0.869607
32	aflatrem-FAD dependent oxidoreductase	AFLA_096380	AFL2G_08642	1226	1.14841	1.57939	2.74861	0	1.66055
32	aflatrem-geranylgeranyl pyrophosphate synthase AtmC	AFLA_096390	AFL2G_08643	1118	0	0	129.437	0	0
32	aflatrem-FAD-dependent monooxygenase AtmM	AFLA_096400	AFL2G_08644	1644	0	0	53.4504	0	0
32	PTH11-like integral membrane protein	AFLA_096410	AFL2G_08645	1180	0.480263	3.4088	0.317805	1.07751	1.34399
32	hypothetical protein	AFLA_096420	AFL2G_08646	445	0	0.841105	0.941002
32	cytochrome P450	AFLA_096430	AFL2G_08647	1650	5.3202	3.59576	1.18318	8.11902	2.66862
32	acyl transferase	AFLA_096440	AFL2G_08648	1439	2.28325	3.58871	1.58925		9.90446
32	necrosis and ethylene inducing peptide	AFLA_096450	AFL2G_08649	813	0.326179	0	0	0	0
33	NRPS-like enzyme 163aa pp domain	AFLA_096700	-	711	0	0	0.525516	0	0
33	NRPS-like enzyme 317 aa C domain	AFLA_096710	AFL2G_08672	953	0			0.472658	0
33	hypothetical protein	AFLA_096720	AFL2G_08673	248	2.8295	1.48704	1.1091	1.11144
33	conserved hypothetical protein	AFLA_096730	AFL2G_08674	564	0	0	0.179506	0
33	monoxygenase	AFLA_096740	AFL2G_08675	1512	0	0	1.13097	0
33	cytochrome P450	AFLA_096750	AFL2G_08676	1171	0.209874	0	0.49772	0
33	monocarboxylate transporter	AFLA_096760	AFL2G_08677	1634	0			0
33	polyketide synthase 947 aa KS-AT	AFLA_096770	AFL2G_08678	3033	0	0	0.382636	0
34	MFS transporter	AFLA_100280	AFL2G_10930	1543	0.628779	0.648563	0.564349	5.24872
34	aliphatic nitrilase	AFLA_100290	-	1163	6.56264	4.83509	0.841455	4.32602
34	C6 transcription factor	AFLA_100300	AFL2G_10931	2344	11.4831	8.73384	2.06697	14.8828
34	oxidoreductase	AFLA_100310	AFL2G_10932	905	17.8858	20.3202	3.98835	2.10286
34	hypothetical protein	AFLA_100320	-	319	0
34	FAD dependent oxidoreductase	AFLA_100330	AFL2G_10933	1367	0.686693				7.88058
34	nonribosomal peptide synthase 1225aa A-PP-C	AFLA_100340	AFL2G_10935	3677	0				0.79548
34	conserved hypothetical protein	AFLA_100350	AFL2G_10936	2425	0.34135	0.221526	20.1573	1.61626
35	alcohol dehydrogenase -lnaE flavin oxidoreductase	AFLA_101690	AFL2G_11053	1115	7.12063	6.16046	3.06317	9.35762	10.4978
35	NRPS-like enzyme -1042 aa A-PP-SDR-TE lnaA	AFLA_101700	AFL2G_11054	3128	0.750556	1.13545	117.908	0.728376	0
35	NmrA-like family protein-lnaB-reductase/epimerase	AFLA_101710	AFL2G_11055	1117	2.80417	2.24964	563.051	2.64124	1.01368
35	cytochrome P450 -lnaC	AFLA_101720	AFL2G_11056	1753	0	0	5.42973	0	0
35	ferulate-5-hydroxylase -lnaD (cytochrome P450)	AFLA_101730	AFL2G_11057	1743	0	0.208646	48.3193	0	0.328415
35	transporter-lnaF	AFLA_101740	AFL2G_11058	1595	4.90257	0.217498	0.729989	7.15002	1.71506
36	PKS-like enzyme 689aa KS domain	AFLA_104210	AFL2G_03890	2508	0	0.14953	0
36	C6 factor	AFLA_104220	AFL2G_03891	2184	6.46876	2.88514	5.15317		0.888957
36	MFS transporter	AFLA_104230	AFL2G_03892	1837	4.41031	1.13129	0.773456
36	PKS-like enzyme 301 aa KS domain	AFLA_104240	AFL2G_03893	1059	2.59215	0.235583	1.09818
36	PKS-like enzyme 696 aa ER domain	AFLA_104250	AFL2G_03894	2354	5.16645
36	Phosphotransferase enzyme family protein	AFLA_104260	AFL2G_03897	1226	1.29038	0.591546	1.87511		0.466458
36	acyl-CoA dehydrogenase family protein	AFLA_104270	AFL2G_03898	1459	0.879584	0.483872	0.180447		0
37	geranylgeranyl diphosphate synthase 320aa	AFLA_105050	AFL2G_03970	1135	9.99876	1.00618	0.375228	13.7129	1.58683
37	epimerase/dehydratase	AFLA_105060	AFL2G_03971	809	9.27798	0.398746	0.297403	22.3669	3.78715
37	Cytochrome P450 family protein	AFLA_105070	AFL2G_03972	1767	10.0129	0	0.311236	31.7102	1.97431
37	ent-copalyl diphosphate/ent-kaurene synthase-related terpene synthase family	AFLA_105080	AFL2G_03973	1016	4.14583	0	0.257919	14.6941	0.181789
37	MFS transporter 525 aa	AFLA_105090	AFL2G_03976	1981	1.93475	0.614039	0.457978	1.16457	0
37	B-galactosidase	AFLA_105100	AFL2G_03977	2016	1.54428	2.11478	0.573563	3.1985	1.34116
37	hypothetical protein 123 aa	AFLA_105110	-	508	3.78788	0.868237	0
37	GNAT protein AT 183aa	AFLA_105120	AFL2G_03978	551	0.850902	0	0.218203	0.219557	2.76833
37	hypothetical protein225aa	AFLA_105130	AFL2G_03979	772	50.5722	48.5906	3.02009	77.7753	62.3568
37	hypothetical protein115aa	AFLA_105140	AFL2G_03980	408	3.37427	0	0	0.48966	4.35361
37	Carboxylesterase-extracellular family protein 416aa	AFLA_105150	AFL2G_03981	1420	0.187729	1.07877	0.160919	0	0.632368
37	hypothetical protein110 aa	AFLA_105160	-	470	0.705252
37	O-methyltransferase family protein 402aa	AFLA_105170	AFL2G_03982	1461	0.388501	0.5343	8.96637	2.35206	7.58371
37	hypothetical protein 89aa	AFLA_105180	-	269	0
37	NRPS-like enzyme 1055aa A-NADP	AFLA_105190	AFL2G_03983	3326	0.889579	0.611713	10.8358	6.03062	13.6669
38	cytochrome P450	AFLA_105440	AFL2G_04005	1346	3.47518
38	polyketide synthase 2475aa KS_AT_MT_M_KR	AFLA_105450	AFL2G_04006	8231	4.1734	0.845066	0.441202
38	conserved hypothetical protein	AFLA_105460	AFL2G_04007	518	33.2927			8.93069
39	NADH oxidase	AFLA_108540	AFL2G_04284	1241	20.2325	21.5843	1.93959	9.77336	11.0733
39	polyketide synthase 1751 aa KS-AT-PP	AFLA_108550	AFL2G_04285	5445	0	0	10.6103	0.157189	0.100408
39	O-methyltransferase	AFLA_108560	AFL2G_04286	1467	0	0	71.3116	0	0
39	conserved hypothetical protein	AFLA_108570	AFL2G_04287	1074	0	0	55.5492	0	0
39	cytochrome P450	AFLA_108580	AFL2G_04288	1759	0	0	352.682	0	0
40	toxin biosynthesis ketoreductase like nor-1 (59%)	AFLA_112820	AFL2G_04686	931	33.1098	26.9154	2.75218	36.2715	3.4232
40	C6 factor	AFLA_112830	AFL2G_04688	2297	2.51511	1.00888	1.34369	2.47501
40	polyketide synthase 2137aa KS_AT_DH-PP	AFLA_112840	AFL2G_04689	7004	0.475995	0.483716	0.721556	0.573562
40	O-methyltransferase	AFLA_112850	AFL2G_04690	1406	1.34971	0	0.593341	0.618283
40	conserved hypothetical protein	AFLA_112860	AFL2G_04691	1083	0.481741	2.56337	0.573563	0.398027
40	monooxygenase	AFLA_112870	AFL2G_04692	1992	1.28861	0.461077	0.429865	0
40	24-dichlorophenol 6-monooxygenase 640aa	AFLA_112880	AFL2G_04693	2114	0.59941	0	0.611102
40	MFS transporter	AFLA_112890	AFL2G_04694	1529	25.4817	2.26921	1.03429	13.3557	0.386767
40	epoxide hydrolase	AFLA_112900	AFL2G_04695	860	21.2755	18.3812	0.139893	25.4565	15.6315
41	hypothetical protein	AFLA_114800	-	378	6.88202
41	cytochrome P450	AFLA_114810	AFL2G_12402	1823	5.51504	3.371	3.6928	7.01027	10.7317
41	polyketide synthase 1120 aa KS_AT_KR-PP	AFLA_114820	AFL2G_12403	5432	2.4149	0.849161	1.5155	1.49548	1.63353
42	zinc-binding dehydrogenase family oxidoreductase	AFLA_116160	AFL2G_11307	1218	0	0	0.204323	0	0
42	hypothetical protein	AFLA_116170	AFL2G_11308	388	0	27.4646	3.2775		6.93023
42	hypothetical protein	AFLA_116180	AFL2G_11309	701	0	1.51636	1.50796	0.581732	0
42	conserved hypothetical protein	AFLA_116190	AFL2G_11310	6124	0	0.52827	1.20172	0	0.333086
42	conserved hypothetical protein	AFLA_116200	AFL2G_11311	506	1.38964	1.75059	0.326418	0	4.01872
42	O-methyltransferase	AFLA_116210	-	1372	2.58481	1.77743	0.094692	0.139093	0.385888
42	polyketide synthase 2104aa KS_AT-PP-TE	AFLA_116220	AFL2G_11312	6465	0	0.101472	0.189206	0	0.0813564
42	C6 prot	AFLA_116230	AFL2G_11313	842	0	1.14941	0	0	1.72815
42	hypothetical protein	AFLA_116240	AFL2G_11314	947	3.09012	245.305	2.03288		5.85485
42	conserved hypothetical protein	AFLA_116250	AFL2G_11315	1065	0.239397	1.6021	0.358477	2.30461	2.27907
42	N-hydroxyarylamine O-acetyltransferase	AFLA_116260	AFL2G_11316	1009	0.245401	2.69997	0.25172		0.532259
43	dihydroflavonal-4-reductase	AFLA_116480	AFL2G_11336	1086	0	0.666634	1.24302	0	0.525668
43	conserved hypothetical protein	AFLA_116490	AFL2G_11337	476	0.492346	0	0.757536	0	1.06787
43	PKS-like enzyme 413aa KR-(FAS-SDR)-PP	AFLA_116500	AFL2G_11338	1504	0	0	0.0861575
43	conserved hypothetical protein	AFLA_116510	AFL2G_11339	1211	0.960527	0.845509	1.15613	0.345496
43	gibberellin 2-beta-dioxygenase	AFLA_116520	AFL2G_11340	1170	0.567268	1.21996	1.59233	2.92018
43	cytochrome P450 alkane hydroxylase	AFLA_116530	AFL2G_11341	1556	0.150834	0	0	0.271166
43	conserved hypothetical protein	AFLA_116540	AFL2G_11342	710	0	0	0	0	0
43	conserved hypothetical protein	AFLA_116550	AFL2G_11343	570	4.49902	0	0	23.0787	2.92743
43	NmrA-like family protein	AFLA_116560	AFL2G_11344	989	10.6749	3.58871	0.48666	1.65	13.1876
43	DUF636 domain protein	AFLA_116570	AFL2G_11345	518	5.05051	6.9459	0.518057	0.516932	26.2902
43	male sterility domain cotaining protein	AFLA_116580	AFL2G_11346	1367	0	0	0.18375	0	0
43	CRAL/TRIO domain protein	AFLA_116590	AFL2G_11347	736	12.8777	6.31445	7.77085	24.9992	28.3814
43	dimethylallyl tryptophan synthase	AFLA_116600	AFL2G_11348	1456	2.64087	0.526462	0.981648	17.291	0.385888
43	conserved hypothetical protein	AFLA_116610	AFL2G_11349	1832	0.922526	0.702522	0.458476	0	12.2642
43	hypothetical protein	AFLA_116620	-	334	0
43	(S)-2-hydroxy-acid oxidase	AFLA_116630	AFL2G_11350	1269	0.537822	0	25.2637	0.181018	40.0284
43	conserved hypothetical protein	AFLA_116640	AFL2G_11351	745	4.04912	7.42493	3.11504	2.18968	2.9401
43	pectate lyase	AFLA_116650	AFL2G_11352	1403	1.23605	0.849959	3.27535	1.79112	0.446818
43	conserved hypothetical protein	AFLA_116660	-	922	0	0	0.183331	0
44	transferase family protein	AFLA_116870	AFL2G_11370	1364	0.17205	0.236619	0.176481	2.24383	0.373166
44	C6 transcription factor	AFLA_116880	AFL2G_11371	1820	0	0	0	0.266913	0
44	polyketide synthase 2580 aa KS_AT_PP_M-TE	AFLA_116890	AFL2G_11372	7790	0.151652	1.00462	0.343424	0.342819	0
44	conserved hypothetical protein	AFLA_116900	AFL2G_11373	712	0	0	0	0	0
44	hypothetical protein	AFLA_116910	AFL2G_11374	564	0
44	short-chain dehydrogenase	AFLA_116920	AFL2G_11377	6705	16.1671	1.34787	1.69645	6.58962	1.2671
45	C6 transcription factor	AFLA_118300	AFL2G_11513	2121	12.732	18.5504	1.93959		23.2403
45	conserved hypothetical protein	AFLA_118310	AFL2G_11514	1774	20.2824				47.477
45	hypothetical protein	AFLA_118320	-	628	17.3514	3.83452	2.19997	48.1923	4.88439
45	conserved hypothetical protein	AFLA_118330	AFL2G_11515	767	1.22317	9.33066	1.07065	4.65333	5.96921
45	flavin containing polyamine oxidase	AFLA_118340	AFL2G_11516	1814	28.1053	1.21195	4.29365	99.5664	16.8835
45	glutamate decarboxylase	AFLA_118350	AFL2G_11517	1463	0.481248	0.684289	0.935685	3.32514	2.78345
45	conserved hypothetical protein	AFLA_118360	AFL2G_11518	917	1.27913	1.40734	3.80501	36.525	7.7682
45	conserved hypothetical protein	AFLA_118370	AFL2G_11520	843	24.0871	55.7922	11.866		26.8091
45	conserved hypothetical protein	AFLA_118380	AFL2G_11521	1133	2.92101	4.81168	1.79439	3.21838	9.48552
45	NCS family nucleoside transporter	AFLA_118390	AFL2G_11522	1481	6.65493	3.05856	0.912487	21.8901	4.50203
45	hypothetical protein	AFLA_118400	-	290	3.22816
45	conserved hypothetical protein	AFLA_118410	AFL2G_11523	1296	2.67634	16.76	0.635611	0.745212	1.79199
45	hypothetical protein	AFLA_118420	AFL2G_11526	616	0.418625	4.03011	0.644108		0
45	conserved hypothetical protein	AFLA_118430	AFL2G_11527	599	0	0	0	0	0
45	NRPS-like enzyme 1048 aa CaiC (A-PP-NADP-TE)	AFLA_118440	AFL2G_11528	3303	0.223879	0	0.727206	0	0
45	conserved hypothetical protein	AFLA_118450	AFL2G_11529	2105	0.334543	6.91548	0.175837	0.406952	3.71805
45	amino acid transporter	AFLA_118460	AFL2G_11531	7147	5.03189	11.3099	1.05443		1.29364
46	polyketide synthase 2460aa KS-AT-DH-M-ER-KR-PP	AFLA_118940	AFL2G_11574	7639	0.0636188	0	0.815359	0.110626	19.1109
46	conserved hypothetical protein	AFLA_118950	AFL2G_11575	791	0	0	0	0	7.07461
46	polyketide synthase 2253aa KS-AT-PP-MT	AFLA_118960	AFL2G_11576	6761	0.0694614	0.191058	1.10438	0.211375	21.8453
46	MAK1-like monooxygenase	AFLA_118970	AFL2G_11577	1523	0.496509	1.13807	0.763942	1.15117	13.2817
47	oxidoreductase short chain dehydrogenase/reductase family	AFLA_119090	AFL2G_11592	1170	0	0	0.468215	0	0
47	hypothetical protein	AFLA_119100	-	277	0
47	NRPS-like enzyme 1043 aa A-PP-TE	AFLA_119110	AFL2G_11593	3313	0.149967	0.103124	0.730689	0	0
47	beta-lactamase family protein	AFLA_119120	AFL2G_11594	1404	3.99015	4.70365	2.24135	13.4208	5.76959
47	conserved hypothetical protein	AFLA_119130	AFL2G_11595	727	1.05313	1.93115	0.900211		1.52279
47	short-chain dehydrogenases/reductase	AFLA_119140	AFL2G_11597	894	0.309419	0	0.158693	3.85261	0
48	fumarylacetoacetate hydrolase	AFLA_121440	AFL2G_11799	994	20.8755	43.8201	5.35325	39.6314	8.93635
48	trihydroxytoluene oxygenase	AFLA_121450	AFL2G_11800	1232	1.99588	1.51873	3.08358	2.60349	2.88596
48	hypothetical protein	AFLA_121460	-	816	0
48	hscarg dehydrogenase	AFLA_121470	AFL2G_11802	1216	10.6539
48	phytanoyl-CoA dioxygenase family protein	AFLA_121480	-	973	26.7177
48	NmrA-like family protein-lnbB-reductase/epimerase	AFLA_121490	AFL2G_11803	1189	14.2121
48	cytochrome P450 -lnbC	AFLA_121500	AFL2G_11804	1724	3.26179
48	conserved hypothetical protein-methyltransferase	AFLA_121510	AFL2G_11805	917	9.46678
48	NRPS-like enzyme lnbA A-PP-SDR	AFLA_121520	AFL2G_11806	3092	0.621293
48	NADH-dependent flavin oxidoreductaselnbE-flavin oxid	AFLA_121530	AFL2G_11807	1133	3.93486
48	MFS multidrug transporter -transporter	AFLA_121540	AFL2G_11808	1504	2.28325
48	conserved hypothetical protein	AFLA_121550	-	836	13.1875
48	conserved hypothetical protein	AFLA_121560	AFL2G_11809	1085	8.2659	16.4171	3.54449
48	conserved hypothetical protein	AFLA_121570	-	610	1.26945	4.65563	5.64262	0.158901	2.75336
48	C-4 methyl sterol oxidase	AFLA_121580	AFL2G_11810	962	21.8883	43.7945	0.272199	7.08167	1.72669
48	zinc-binding alcohol dehydrogenase	AFLA_121590	AFL2G_11811	1139	1.77916	11.3015	0.33273	4.70046	1.40711
48	conserved hypothetical protein	AFLA_121600	AFL2G_11812	823	22.1498	0	0	39.8824	1.96669
48	cytochrome P450	AFLA_121610	AFL2G_11813	1663	7.03412	0	0.264721	15.7794	1.1195
48	conserved hypothetical protein	AFLA_121620	-	1037	0.905005	0	0	0.564836	0.713406
48	short-chain dehydrogenase/oxidoreductase	AFLA_121630	AFL2G_11814	876	0.582029	0.800457	0.298509	1.26511	0.631192
49	efflux pump antibiotic resistance protein	AFLA_125600	AFL2G_08908	1813	0.548392	1.17023	0.509141	0.585066	0.315596
49	conserved hypothetical protein	AFLA_125610	AFL2G_08909	1859	1.50223	5.29482	0.365659	4.392	2.25101
49	ThiJ/PfpI family transcriptional regulator	AFLA_125620	AFL2G_08910	647	2.17453	20.4357	0.743508		0.786068
49	PKS-like enzyme 426 aa KR-PP	AFLA_125630	-	1382	0				0
49	PKS-like enzyme 708 aa AT-DH	AFLA_125640	AFL2G_08911	2486	0	0	0.484292	0
49	hypothetical protein	AFLA_125650	AFL2G_08913	407	0.674853	0	0		0
50	ankyrin repeat protein	AFLA_126660	AFL2G_09009	953	0	2.73715	0		12.1279
50	hypothetical protein	AFLA_126670	-	610	0
50	WD repeat domain	AFLA_126680	AFL2G_09010	1631	0	7.12465	0.664237	0	4.36961
50	conserved hypothetical protein	AFLA_126690	AFL2G_09011	881	0	6.59152	0.819376	0	35.8062
50	hypothetical protein	AFLA_126700	AFL2G_09012	233	0	0	1.54421
50	polyketide synthase 2505 aa KS_AT_DH_M_ER_KR	AFLA_126710	AFL2G_09015	8338	1.18705	0	0.42915	1.11433	2.01652
50	hypothetical protein	AFLA_126720	-	1285	0
50	conserved hypothetical protein	AFLA_126730	AFL2G_09016	901	19.5011	2.9906	0.159323	31.2651	27.6625
51	C6 factor 247aa	AFLA_126990	AFL2G_09045	1298	0	0.220167	0.246315	0	0.879745
51	conserved hyothetical protein 183 aa	AFLA_127000	-	617	0
51	conserved hyothetical protein 133 aa	AFLA_127010	AFL2G_09046	458	0.584201	3.21377	0.599245	0	24.0748
51	FAD-bindingmonooxygenase 473 aa	AFLA_127020	AFL2G_09047	1482	0.330308	0	0.477338	0.359644	3.23069
51	esterase-lipase 267 aa	AFLA_127030	AFL2G_09048	803	0.292101				1.90064
51	MFS transporter 109 aa	AFLA_127040	AFL2G_09049	1301	0.541126	0	0.647571	0.784132	25.0383
51	transcription initiation 433 aa	AFLA_127050	AFL2G_09050	329	0	0	1.09498	0	0
51	dioxygenase 182aa	AFLA_127060	AFL2G_09051	1208	0	0	0.723413	0	2.54941
51	short-chain dehydrogenase	AFLA_127070	AFL2G_09052	907	0.295407	0	0.606029	0	2.26388
51	NMRA-like protein 298 aa	AFLA_127080	AFL2G_09053	1016	0.523632	0	1.00688	0	1.06119
51	polyketide synthase 2586aa KS-AT-PP-TE	AFLA_127090	AFL2G_09054	7871	0.242081	0.249698	0.605267	1.28211	3.52435
51	thioredoxin-like family 284 aa	AFLA_127100	AFL2G_09055	925	5.21886	1.8888	2.11313	7.61065	10.7236
51	MFS transporter	AFLA_127110	AFL2G_09056	1508	14.708	4.33707	5.04246	52.2281	12.0704
52	hypothetical protein	AFLA_128030	-	656	0.910267
52	efflux pump antibiotic resistance protein	AFLA_128040	AFL2G_09148	1222	1.20066	0.390078	0.218203	0.455523	3.6911
52	conserved hypothetical protein	AFLA_128050	AFL2G_09149	906	0.843768	4.83378	4.91625		3.12978
52	polyketide synthase 2591 aa KS-AT-DH-M-ER-NADB-PP	AFLA_128060	AFL2G_09150	8573	0.271816	0.71188	1.84272	1.76866	9.17966
52	conserved hypothetical protein	AFLA_128070	AFL2G_09151	1349	13.6198	7.32206	97.8958	29.58	23.095
52	conserved hypothetical protein	AFLA_128080	AFL2G_09152	1449	8.16557	3.41782	51.5296	24.0403	21.9457
52	cytochrome P450 alkane hydroxylase	AFLA_128090	AFL2G_09153	1588	1.96843	1.20292	4.33644		0.695864
53	cytochrome P450	AFLA_135430	AFL2G_06876	1729	0
53	cytochrome P450	AFLA_135440	AFL2G_06877	1854	0.152896
53	trichodiene synthase	AFLA_135450	AFL2G_06878	1172	0
53	conserved hypothetical protein	AFLA_135460	AFL2G_06879	1313	2.13305
53	ornithine decarboxylase	AFLA_135470	AFL2G_06880	1433	0
53	galactose-proton symport	AFLA_135480	AFL2G_06881	536	3.06134
53	nonribosomal peptide synthase 1071 aa A-PP-C	AFLA_135490	AFL2G_06882	3215	0.14605
53	conserved hypothetical protein	AFLA_135500	AFL2G_06883	1253	0	0	0.225558	0.327225	0.365928
54	aflYa/ nadA/ NADH oxidase	AFLA_139140	AFL2G_07209	1130	20.0903	0.527752	0.295216	0	38.5368
54	aflY/ hypA/ hypP/ hypothetical protein	AFLA_139150	AFL2G_07210	1600	154.37	2.40734	0.448875	0	113.993
54	aflX/ ordB/ monooxygenase/ oxidase	AFLA_139160	-	800	191.456				83.3056
54	aflW/ moxY/ monooxygenase	AFLA_139170	AFL2G_07211	1442	220.476	1.72811	0.773343	0	132.726
54	aflV/ cypX/ cytochrome P450 monooxygenase	AFLA_139180	AFL2G_07212	1648	236.848	1.05758	0.709911	0	189.805
54	aflK/ vbs/ VERB synthase	AFLA_139190	AFL2G_07213	1986	618.591	1.17023	0.49875	0	261.277
54	aflQ/ ordA/ ord-1/ oxidoreductase/ cytochrome P450 monooxigenase	AFLA_139200	AFL2G_07214	1950	76.9109	0.203519	0.379484	0	55.848
54	aflP/ omtA/ omt-1/ O-methyltransferase A	AFLA_139210	AFL2G_07215	1486	415.836	2.82643	0	0	558.001
54	aflO/ omtB/ dmtA/ O-methyltransferase B	AFLA_139220	AFL2G_07216	1333	660.449	15.5789	0.414981	0
54	aflI/ avfA/ cytochrome P450 monooxygenase	AFLA_139230	-	960	40.2965	1.13328	0.986126	0	70.7461
54	aflLa/ hypB/ hypothetical protein	AFLA_139240	-	541	281.628	5.25178	0	0
54	aflL/ verB/ desaturase/ P450 monooxygenase	AFLA_139250	AFL2G_07217	1661	240.545	7.30636	0.0801385	0	263.667
54	aflG/ avnA/ ord-1/ cytochrome P450 monooxygenase	AFLA_139260	-	1591	134.154	1.95353	0	0	240.309
54	aflNa/ hypD/ hypothetical protein	AFLA_139270	AFL2G_07218	389	720.203	57.3722	0.792423		314.766
54	aflN/ verA/ monooxygenase	AFLA_139280	AFL2G_07219	1703	129.44	2.17938	0.812741	0	73.8638
54	aflMa/ hypE/ hypothetical protein	AFLA_139290	-	383	416.49	3.36442	0.941002		94.1808
54	aflM/ ver-1/ dehydrogenase/ ketoreductase	AFLA_139300	AFL2G_07220	900	1188.23			0.258794	599.11
54	aflE/ norA/ aad/ adh-2/ NOR reductase/ dehydrogenase	AFLA_139310	AFL2G_07221	1284	390.029	11.2113	0.430392	0.430777	4.47997
54	aflJ/ estA/ esterase	AFLA_139320	AFL2G_07222	1001	530.336	6.81401	1.01644	0.215388	123.268
54	aflH/ adhA/ short chain alcohol dehydrogenase	AFLA_139330	-	974	386.315	7.36446	0.39234	3.17138
54	aflS/ aflJ pathway regulator	AFLA_139340	AFL2G_07223	1451	151.93	65.7931	0.418223	36.8673	35.8491
54	aflR / apa-2 / afl-2 / transcription activator	AFLA_139360	AFL2G_07224	1334	24.8043	3.87097	1.71424	11.1653	29.6902
54	aflB / fas-1 / fatty acid synthase beta subunit	AFLA_139370	AFL2G_07225	5846	46.2901	2.90669	0.340069	4.24581	68.3118
54	aflA / fas-2 / hexA / fatty acid synthase alpha subunit	AFLA_139380	AFL2G_07226	5144	66.9133	1.54864	0.531321	1.70124	110.071
54	aflD / nor-1 / reductase	AFLA_139390	AFL2G_07227	1043	454.041	8.3121	0.295216	3.00277	398.883
54	aflCa / hypC / hypothetical protein	AFLA_139400	-	773	335.392	5.21707	0	0.611342	418.119
54	aflC / pksA / pksL1 / polyketide synthase 2109 aa KS-AT-PP-TE	AFLA_139410	AFL2G_07228	6623	197.043	1.37766	1.12266	4.17019	194.012
54	aflT / aflT / transmembrane protein	AFLA_139420	AFL2G_07229	2220	36.4399	35.6889	11.5346	13.488	142.612
54	aflU / cypA / P450 monooxygenase	AFLA_139430	-	1489	3.62002	0.843301	0.209657
54	aflF / norB / dehydrogenase	AFLA_139440	AFL2G_07230	762	8.46302	5.66639	0.528282		41.5348
55	MFS multidrug transporter	AFLA_139460	AFL2G_07233	1605	113.723	21.4662	13.0547	2.42668
55	FAD dependent oxidoreductase	AFLA_139470	AFL2G_07234	1367	194.506	108.37	8.89274	109.968
55	dimethylallyl tryptophan synthase	AFLA_139480	AFL2G_07235	1369	128.684	347.319	39.8744	13.1199
55	hybrid PKS/NRPS enzyme 3851 aa; KS_AT_DH_M_KR_PP_C-A-T-NADB	AFLA_139490	AFL2G_07236	11720	6.01551	2.65327	19.8083	0.466183	1.19571
a Color code: Orange, Gene clusters do not have a typical backbone gene. Yellow, Metabolites produced by the clusters 15, 32, aflatrem; cluster 27, asparasone; clusters 35 and 48, pyrazines LNA-A and LNA-B; cluster 54, the aflatoxins; cluster 55, cyclopiazonic acid. Light pink, RPKM values are > 1.
b Clusters numbers were identified by by SMURF in NRRL3357 (Khaldi, N.; Seifuddin, F.T.; G., T.; Haft, D.; Nierman, W.C.; Wolfe, K.H.; Fedorova, N.D. SMURF: genomic mapping of fungal secondary metabolite clusters. Fungal Genet Biol 2010, 47, 736-741.)
