# Supplementary material for: Comparison of Expression of Secondary Metabolite Biosynthesis Cluster Genes in Aspergillus flavus, A. parasiticus, and A. oryzae
Source: Toxins (Basel). 2014 Jun 23;6(6):1916–28. doi: 10.3390/toxins6061916 (PMC4073137; doi:10.3390/toxins6061916)
Supplement: Supplementary File 1 — Supplementary Table 2 (XLSX, 19 KB) [file toxins-06-01916-s002.xlsx]

## Sheet: Sheet1
Table S2. Gene clusters in A. flavus, A. oryzae, and A. parasiticus not identified by SMURF and comparison of gene expression levelsa
gene name	gene size (bp)	A. flavus NRRL3357		A. flavus AF70		A. oryzae RIB40		A. parasiticus BN9
		AFLA#	RPKMb	AF70 gene	RPKM	AO gene	RPKM	AP gene	RPKM
AFLA_005310-AFLA_005360
V-type ATPase, C subunit family protein	2627	AFLA_005310	4.45019	587.m000035	111.464	AO090102000453	0	14.m004426	1.91313
polyketide synthase 2595 aa KS-AT-DH-M-ER-PP	8197	AFLA_005320	3.40754	Not foundc		Not found		Not found
hypothetical protein	825	AFLA_005330	9.66841	Not found		Not found		Not found
conserved hypothetical protein	1036	AFLA_005340	105.932	587.m000036	34.04	Not found		14.m004425	18.7269
hypothetical protein	270	AFLA_005350	14.7868	Not found		Not found		Not found
FAD-binding oxidase	1713	AFLA_005360	8.63717	587.m000037	0.565647	AO090102000457	18.1183	14.m004421	0.601029
AFLA_038200-AFLA_038390
oxidoreductase, short chain dehydrogenase/reductase family protein	899	AFLA_038200	0	442.m000095	0	AO090011000004	0	4.m008955	1.2274
C6 transcription factor,	749	AFLA_038220	1.53496	442.m000096	0	AO090011000006	1.81232	4.m008954	2.91828
hypothetical protein	423	AFLA_038230	8.88317	442.m000097	38.1778	AO090011000007	23.653	4.m008951	7.22514
Major Facilitator Superfamily protein	1796	AFLA_038240	0	442.m000098	2.77698	AO090011000008	0.184452	4.m008950	0.962896
hypothetical protein	1612	AFLA_038260	0.326406	442.m000099	0.484961	AO090011000009	22.8368	4.m008949	8.03064
hypothetical protein	1243	AFLA_038270	8.85833	442.m000100	4.24979	AO090011000010	0.322827	4.m008948	0.893635
Dynamin family protein	2322	AFLA_038280	4.78858	442.m000101	7.49383	AO090011000011	28.8485	4.m008947	28.5824
TPR Domain containing protein	4278	AFLA_038290	1.38997	186.m000174	1.14696	AO090011000012	4.6554	4.m008946	12.4092
multidrug transporter, ,	1749	AFLA_038300	55.9991	186.m000173	1.99373	AO090011000014	1.63855	4.m008945	2.20099
PKS-like enzyme 1481 aa KS-DH-ER-ER-KR-PP	4446	AFLA_038310	1.74314	186.m000172	0.44525	AO090011000015	0.553806	4.m008944	0.927039
ABC transporter family protein	3980	AFLA_038320	0.658847	186.m000171	0.368704	Not found		4.m008943	0.998035
Dyp-type peroxidase family protein	2565	AFLA_038340	5.21205	186.m000170	2.1475	AO090011000019	2.18938	4.m008941	219.915
F5/8 type C domain containing protein	2328	AFLA_038350	4.13608	186.m000169	0.832434	AO090011000020	2.09543	4.m008940	116.403
hypothetical protein	842	AFLA_038360	5.8626	186.m000168	10.4341	AO090011000021	3.48651	4.m008939	4.48786
alternative oxidase,	1128	AFLA_038370	1.46323	186.m000167	1.67697	AO090011000022	1.64579	4.m008938	1.05789
Major Facilitator Superfamily protein	1730	AFLA_038380	2.05592	186.m000166	0.416485	AO090011000023	26.7248	4.m008937	0.326521
FAD dependent oxidoreductase family protein	1520	AFLA_038390	13.3145	186.m000165	0.220618	AO090011000024	72.2129	4.m008936	1.0438
AFLA_059950-AFLA_060050
oxidoreductase, FAD-binding,	1657	AFLA_059950	0.152301	636.m000041	37.8031	AO090701000525	14.2963	13.m005202	2.55599
hypothetical protein	1014	AFLA_059960	0.231606	636.m000042	12.741	Not found		13.m005203	3.56917
NAD dependent epimerase/dehydratase family protein	995	AFLA_059970	87.5964	636.m000043	638.006	AO090701000526	146.275	13.m005204	75.3412
GMC oxidoreductase family protein	1648	AFLA_059980	2.02282	636.m000044	8.78015	AO090701000527	1.24962	13.m005205	12.8579
Tryptophan halogenase family protein	3465	AFLA_059990	0.452067	636.m000045	30.5929	AO090701000528	34.0314	13.m005206	2.68179
metallo-beta-lactamase superfamily protein	1241	AFLA_060000	0.667184	407.m000090	28.1388	AO090701000529	6.27995	13.m005207	3.91448
hypothetical protein	1630	AFLA_060010	0	Not found		Not found		13.m005208
PKS-like enzyme 1254 aa KS-AT-PP	3917	AFLA_060020	0.124754	407.m000089	2.90361	AO090701000530	4.69926	13.m005208	0.179388
hypothetical protein	2344	AFLA_060030	13.9856	407.m000088	22.9628	Not found		13.m005209	1.18735
Integral membrane prot	1338	AFLA_060040	2.62288	407.m000087	0.593176	AO090701000532	3.39237	13.m005210	0
Amino acid permease family protein	1773	AFLA_060050	7.06199	407.m000086	7.51126	AO090701000533	4.77234	13.m005211	0.329052
AFLA_109380-AFLA_109500
oxidoreductase, zinc-binding dehydrogenase family protein	374	AFLA_109380	1.04656	119.m000209	6.04516	AO090023000523	0.576803	16.m003977	9.98769
conserved hypothetical protein	260	AFLA_109390	23.4849	119.m000210	18.6337	AO090023000524	16.8548	16.m003976	33.3051
hypothetical protein	347	AFLA_109400	5.18878	119.m000211	5.58474	AO090023000525	1.81936	16.m003975	44.3993
UV-endonuclease uvde family protein	727	AFLA_109410	8.29132	119.m000212	12.8841	AO090023000526	7.42347	16.m003974	20.8077
predicted protein	799	AFLA_109420	14.5005	119.m000215	11.8576	AO090023000527	8.93039	16.m003973	11.2808
NRPS 4760 aa A-C-A-C-A-C-C-C	4761	AFLA_109430	2.68013	119.m000213	0.158292	AO090023000528	5.64009	16.m003972	1.10555
AMP-binding enzyme family protein	607	AFLA_109440	0	119.m000214	0	AO090023000529	0	16.m003971	0
hypothetical protein	420	AFLA_109450	0.186388	658.m000029	0.256337	AO090023000530	1.33456	16.m003970	0
Taurine catabolism dioxygenase TauD, TfdA family protein	356	AFLA_109460	1.09948	658.m000028	0.604839	AO090023000531	4.54125	16.m003969	0
Glycosyl hydrolase family 71 protein	481	AFLA_109480	12.9985	658.m000027	29.0977	AO090023000532	64.059	16.m003968	11.8548
PA domain containing protein	721	AFLA_109490	13.0291	679.m000030	0.590735	AO090023000534	2.82288	16.m003967	0.745787
HAD-superfamily hydrolase, subfamily IA, variant 3 containing protein	239	AFLA_109500	0	679.m000032	0.450466	Not found		16.m003965
AFLA_13781-AFLA_137890
phthalate transporter,	447	AFLA_137810	0	35.m000433	0	AO090026000154	0.276678	5.m007450	0
hydrolase family protein	551	AFLA_137820	2.55734	35.m000432	1.76784	AO090026000153	1.64491	5.m007449	0.557605
fungal Zn(2)-Cys(6) binuclear cluster domain-containing protein	153	AFLA_137830	3.38133	35.m000431	2.39732	Not found		5.m007448	13.1003
integral membrane protein	201	AFLA_137840	21.3789	35.m000430	15.8845	AO090026000151	46.1854	5.m007448
hypothetical protein	363	AFLA_137850	3.66614	35.m000429	12.7533	AO090026000150	14.1003	5.m007447	15.9033
hypothetical protein	444	AFLA_137860	66.2937	35.m000428	20.1259	Not found		5.m007446	24.0919
polyketide synthase 2390 aa KS-AT-DH-ER-KR-FabG-PP	2391	AFLA_137870	2.65199	35.m000427	0.541466	AO090026000149	4.32849	5.m007445	4.03926
lipase,	303	AFLA_137880	1.2918	35.m000425	0	AO090026000148	0	5.m007442	2.20507
hypothetical protein	239	AFLA_137890	4.91316	35.m000424	1.3514	AO090026000147	29.7039	5.m007441	4.17518
aOnly PKS- and NRPS-backbone genes with some surrounding genes typical of a secondary metabolite cluster are listed.
bRPKM values > 1 are highlighted in light red.
cNot found: BLASTN search did not give hits with E value below 1e-10 and a percent identity above 80%.
