# Supplementary material for: Comparison of Expression of Secondary Metabolite Biosynthesis Cluster Genes in Aspergillus flavus, A. parasiticus, and A. oryzae
Source: Toxins (Basel). 2014 Jun 23;6(6):1916–28. doi: 10.3390/toxins6061916 (PMC4073137; doi:10.3390/toxins6061916)
Supplement: Supplementary File 1 — Supplementary Table 3 (XLSX, 11 KB) [file toxins-06-01916-s003.xlsx]

## Sheet: Sheet1
Table S3. Metabolites identified in Aspergillus flavus, A. oryzae and A. parasiticusa
Metabolite	Known Gene Clusters	Metabolite class
NRPS-derived from two or more amino acids
TMC (Tyr,Trp,Leu)		Dipeptide
Miyakamides (Trp, 2 Phe, Gly		Tetrapeptide
Ditryptophenaline (Trp, Phe)		Dipeptide
Aspargillomarasmine (3 Gly)		Tripeptide
Ditryptoleucine (Trp, Leu)		Dipeptide
Oryzamide (Trp, Tyr, Pro, Gly		Tetrapeptide
piperazines LnaA, LnaB (two Tyr)	35, 48	Dipeptide
aspirochlorine (Leu, Trp)		Dipeptide
Aspergillic acid		Dipeptide
NRPS-derived from single amino acid
pseurotin (Phe)		Indole diterpene
aflavinines (Trp)		Indole diterpene
cyclopiazonic acid (Trp)	55	Indole diterpene
PKS-derived
aflatoxin	52	Anthraquinone
aflavarin		Flavinoid
asperflavin		Anthraquinone
asparasone	27	Anthraquinone
aspersitin		Phenol
asperfuran		Quinone
flavasperone		Naphthoquinone
maltorhyzine		Phenol
methylsalicylic acid		Phenol
orcellinic acid		Phenol
YWA1		Naphthopyrone
parasperone		Naphthopyrone
Terpene-derived
parasiticolide		Diterpene
sporogen AO1		Diterpene
aflatrem, paspalitrem, paxillline, paspalicin, paspaline (Trp)	15,32	Diterpene
aTurner WB, Aldridge DC: Fungal Metabolites II. Academic Press, London, U.K. (1983); Frisvad JC, Larson TO, De Vries R, et al.: Secondary metabolite profiling, growth profiles and other tools for species recognition and important Aspergillus mycotoxins. Studies in Mycology 59, 31-37 (2007). .
